# Supplementary material
Source: HighWire-hosted journal article supplement (doi:10.1101/rna.029306.111)
Supplement: ChoiSuppLeg_Tables.docx [file ChoiSuppLeg_Tables.docx]

**Supplemental Figure Legends**

**Supplemental Figure 1. Alignments of splice site reads.** Examples of splice site reads that aligned to introns with high coverage. The genomic sequence is above the grey line with the intron in lower case and the exon marked by the box and upper case. The number of total reads to the gene is in parenthesis as is the read count for unique sequences. Sequences were converted to sense orientation for easier comparison to the reference genome. Unambiguous mismatches are in red.

**­­­Supplemental Table Legends**

**Supplemental Table 1.** Alignment with and without terminal homopolymer.

The number of reads that aligned to the reference genome using the complete sequence of each read compared to the number that aligned after removal of the THP as reported by novoalign. The remaining number of reads with unique alignments after excluding clusters with ambiguous base calls (-N) and after excluding potential mouse RNA contamination (-N, -mm9).

**Supplemental Table 2.** Mismatch rate in terminal homopolymer vs next 20 bases.

The rate at which the alignment did not agree with the reference genome was calculated for the THP and for the next 20 bases following the THP. In case the THP was longer than one nucleotide, the mismatch rate was calculated by dividing the total number of nucleotides in THPs by the total number of mismatched bases in THPs. The calculation was repeated after excluding the first cycle of PE2 sequencing**.**

**Supplemental Table 1**

| Supplementary Table 1. Alignment with and without terminal homopolymer | | | |
| --- | --- | --- | --- |
| Input 31,824,185 sequences | Complete sequence | -Terminal homopolymer |
|  |  |  |
| Aligned | 19,612,301 | 21,352,356 |
| Unique alignment | 14,817,548 | 16,527,417 |
| Gapped Alignment | 1,343,686 | 1,003,231 |
| Quality Filter | 7,335,647 | 350,7262 |
| Homopolymer Filter | 29,085 | 869 |
| Unique alignments –N bases |  | 16,429,038 |
| Unique alignments –N, –mm9 |  | 16,304,574 |

**Supplemental Table 2**

| Supplementary Table 2. Mismatch rate in THP vs. next 20 bases (Bases/Mismatch) | | | |
| --- | --- | --- | --- |
|  | All initial PE2 clusters | | Excluding first PE2 cluster |
| THP mismatch rate | | 59.04 | 68.56 |
| Next 20 bases | | 711.96 | 632.28 |
